# Supplementary material for: Reduction of oligomer size modulates the competition between cluster formation and phase separation of the tumor suppressor SPOP
Source: PubMed Central journal article supplement — J Biol Chem. 2023 Nov 4;299(12):105427. doi: 10.1016/j.jbc.2023.105427 (PMC10696467; doi:10.1016/j.jbc.2023.105427), 2023-11-04
Supplement: mmc1.pdf [file mmc1.pdf]

## Supporting Information

### Reduction of oligomer size modulates the competition between cluster formation and phase separation of the tumor suppressor SPOP

Nafiseh Sabri<sup>1</sup>, Matthew J. Cuneo<sup>1</sup>, Melissa R. Marzahn<sup>1,3</sup>, Jihun Lee<sup>1,4</sup>, Jill J. Bouchard<sup>1,5</sup>, Ömer Güllülü<sup>1</sup>, Sivaraja Vaithiyalingam<sup>1</sup>, Madeleine B. Borgia<sup>1</sup>, Jeremy Schmit<sup>2</sup>, Tanja Mittag<sup>1\*</sup>

<sup>1</sup> Department of Structural Biology, St. Jude Children's Research Hospital, Memphis, TN 38103, USA

<sup>2</sup> Department of Physics, Kansas State University, Manhattan, Kansas 66506, USA

<sup>3</sup> Current address: Burnett School of Biomedical Sciences, University of Central Florida, Orlando, FL, USA

<sup>4</sup> Current address: Celltrion, South Korea

<sup>5</sup> Current address: Dewpoint Therapeutics, Boston, MA 02210, USA

\* Correspondence: [tanja.mittag@stjude.org](mailto:tanja.mittag@stjude.org)

#### 4 SI figures

## SI Figures

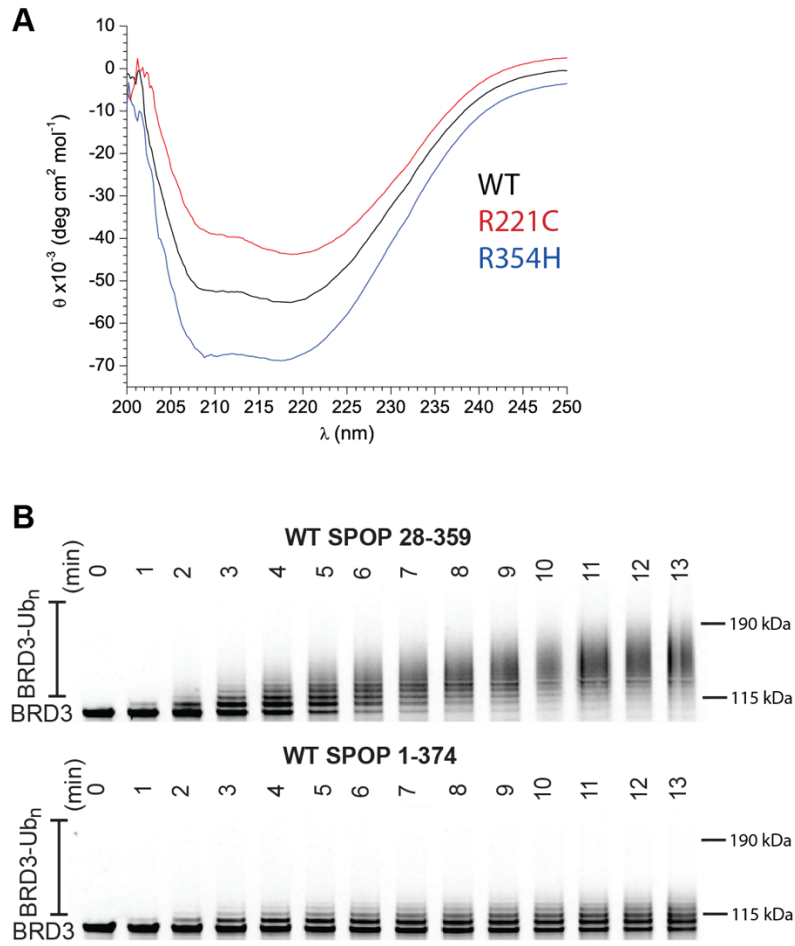

**Figure S1: Biophysical and biochemical characterization of SPOP.**

**(A)** CD spectra of WT and mutant SPOP. Slightly different concentrations between 1 and 2  $\mu$ M protein were used to enable comparison of the offset spectra. **(B)** In vitro ubiquitination assay monitoring polyubiquitination of BRD3 by WT SPOP<sup>28-359</sup> vs full-length SPOP.

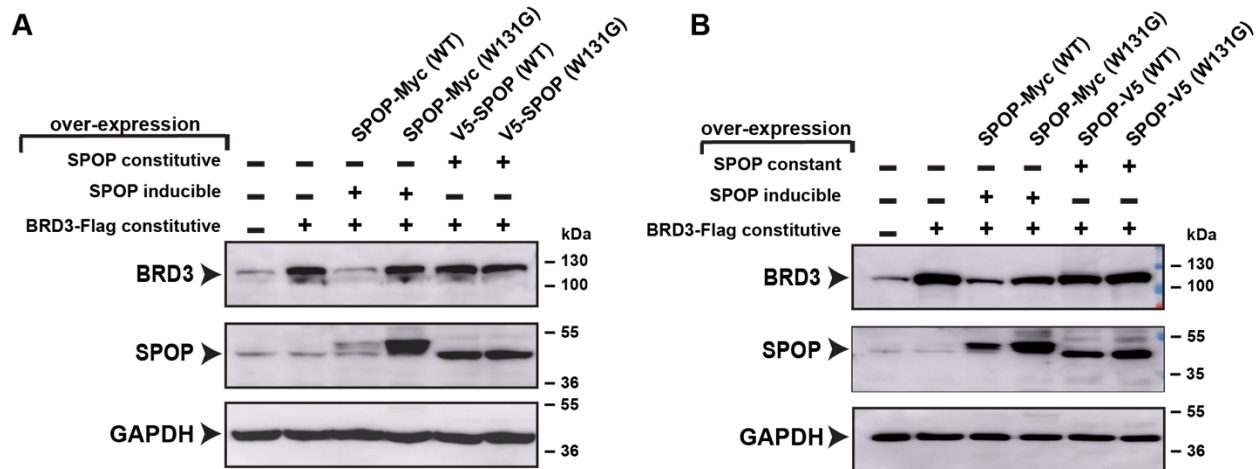

**Figure S2. SPOP expression induced close to endogenous levels mediates BRD3 turnover.**

T-REx cells were transfected with plasmids for BRD3-Flag and SPOP-Myc (inducible expression) or V5-SPOP (constitutive expression). Twenty-four hours post-transfection, cells were lysed, and the resulting lysates were immunoblotted using antibodies for BRD3, SPOP, and GAPDH (loading control). The expected difference in BRD3 turnover for cells expressing SPOP<sup>WT</sup> and SPOP<sup>W131G</sup> is more pronounced with the induced-expression SPOP constructs. The figure shows 2 replicates.

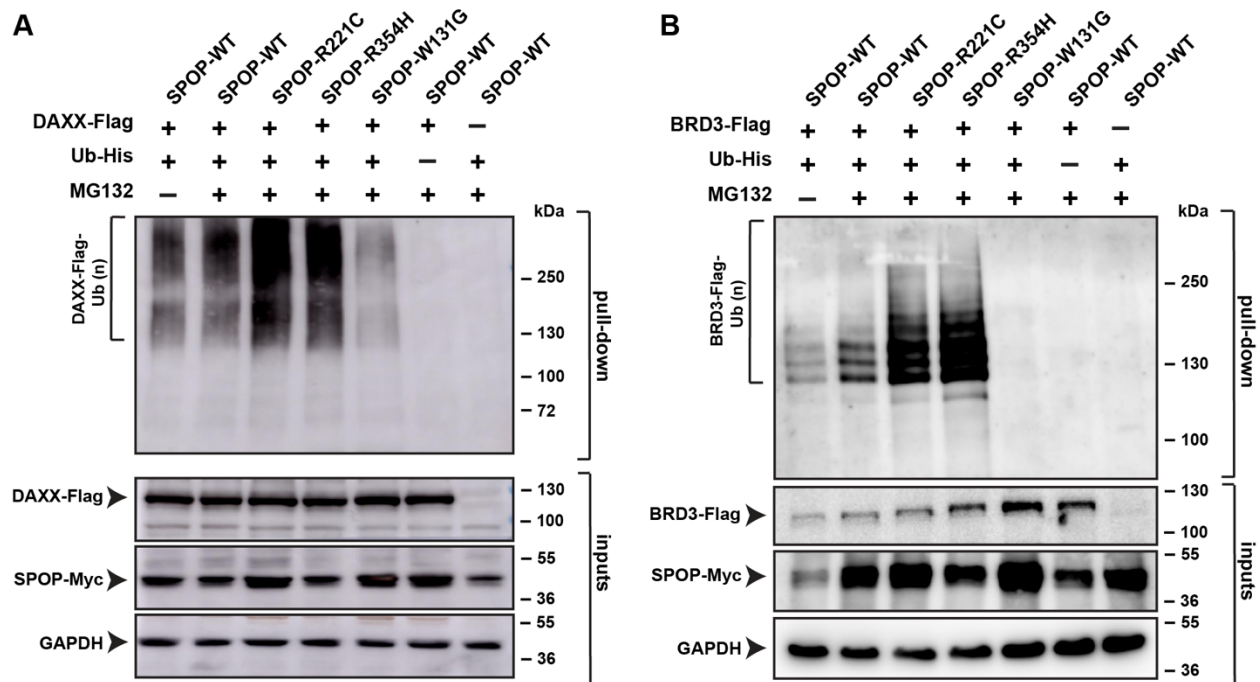

**Figure S3. Replicates of in-cell ubiquitination assays.**

(A) Immunoblot from replicate in-cell ubiquitination assay as in Fig. 4A. (B) Immunoblot from replicate in-cell ubiquitination assay as in Fig. 4C.

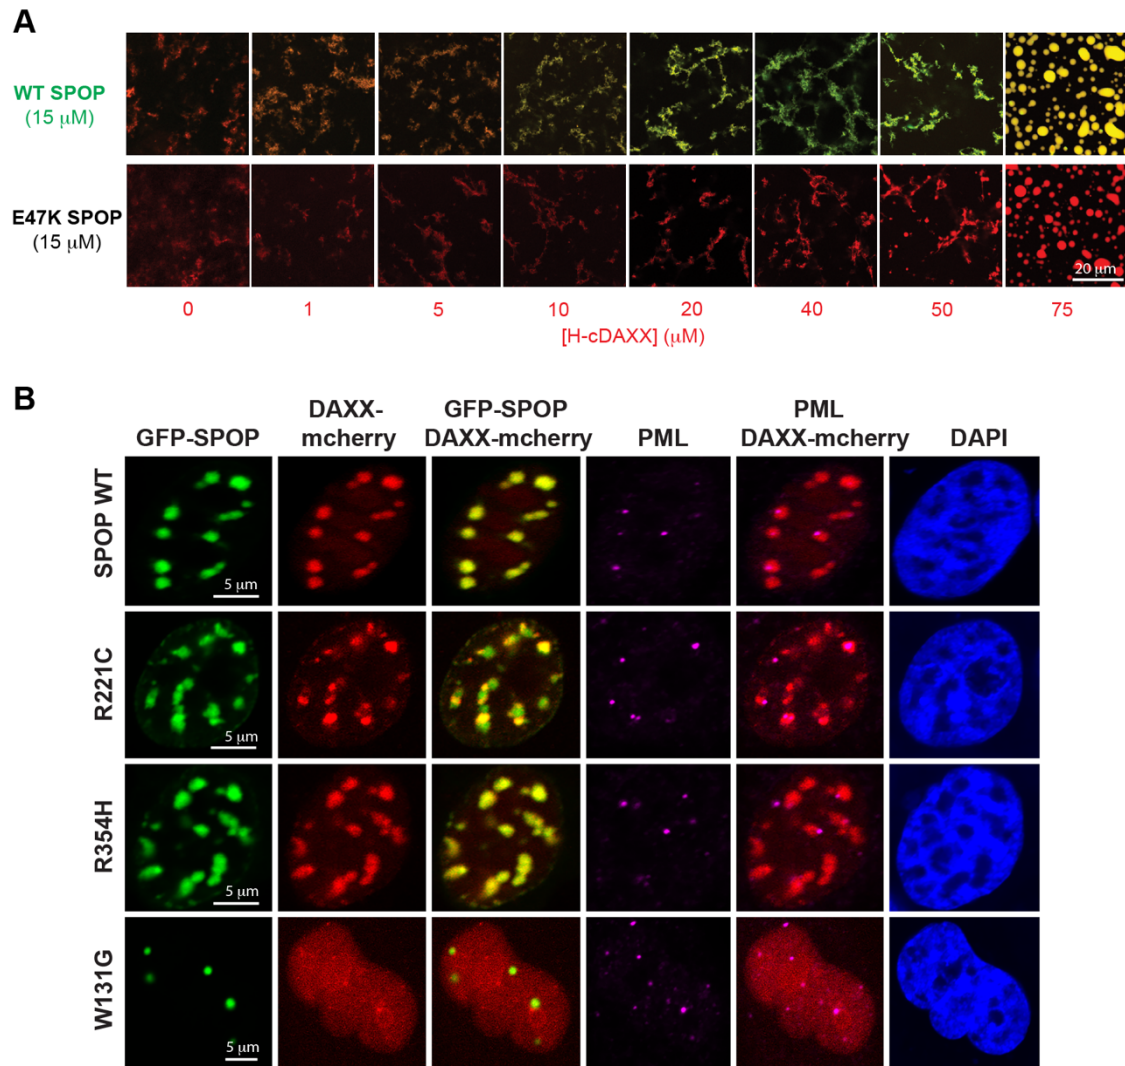

**Figure S4. Phase separation and cellular localization of mutant SPOP.**

(A) Confocal fluorescence microscopy images of SPOP<sup>WT</sup> (green) or SPOP<sup>E47K</sup> (unlabeled) as a function of cDAXX (red) concentration. All samples contain 10% w/v ficoll 70, and/or 500 nM Rhodamine-cDAXX. The samples with SPOP<sup>WT</sup> contain an additional 500 nM ORG-SPOP<sup>WT</sup>. (B) Representative fluorescence confocal images of HeLa cells expressing GFP-SPOP and DAXX-mCherry constructs. Cells were transfected with the indicated plasmids. Twenty-four hours post-transfection, cells were fixed and immuno-stained using an antibody against PML bodies (magenta). DAPI (blue) marks nuclear DNA.
